# Supplementary material for: Cold-shock proteome of myoblasts reveals role of RBM3 in promotion of mitochondrial metabolism and myoblast differentiation
Source: PubMed Central journal article supplement (PMC11061143; doi:10.1038/s42003-024-06196-4), 2024-04-30
Supplement: 42003_2024_6196_MOESM3_ESM.pdf [file 42003_2024_6196_MOESM3_ESM.pdf]

## Description of Additional Supplementary Files

**File name:** Supplementary Data 1

**Description:** Source data behind the graphs and charts in the paper.
